# Supplementary material
Source: publisher site journal article supplement (https://www.spandidos-publications.com/732/downloadSupplementary)

Figure S1. Motility change of human pancreatic cancer cells by the anti-hTM4SF5 mAb treatment. The motility properties of Mia-PaCa-2, ASPC-1, and CFPAC-1 cells were compared after treatment with normal IgG or the anti-hTM4SF5 mAb. (A) Wound healing activity. A monolayer culture of Mia-PaCa-2, ASPC-1, and CFPAC-1 cells was wounded with a pipette tip, and migration of the cells into the wound area was examined at the indicated time points. Scale bar, 200  $\mu$ m. (B, C) The migratory and invasive properties. To measure the (B) migration and (C) invasion activity, the migrated and invaded cells on the lower sides of the transwell chambers were counted after incubation with the indicated materials. Scale bar, 100  $\mu$ m. The percentage of wound healed, migrated, or invaded cells was measured and compared (graphs). Values are the means  $\pm$  SEM. \* $P$ <0.05, \*\* $P$ <0.01 vs. normal IgG control.

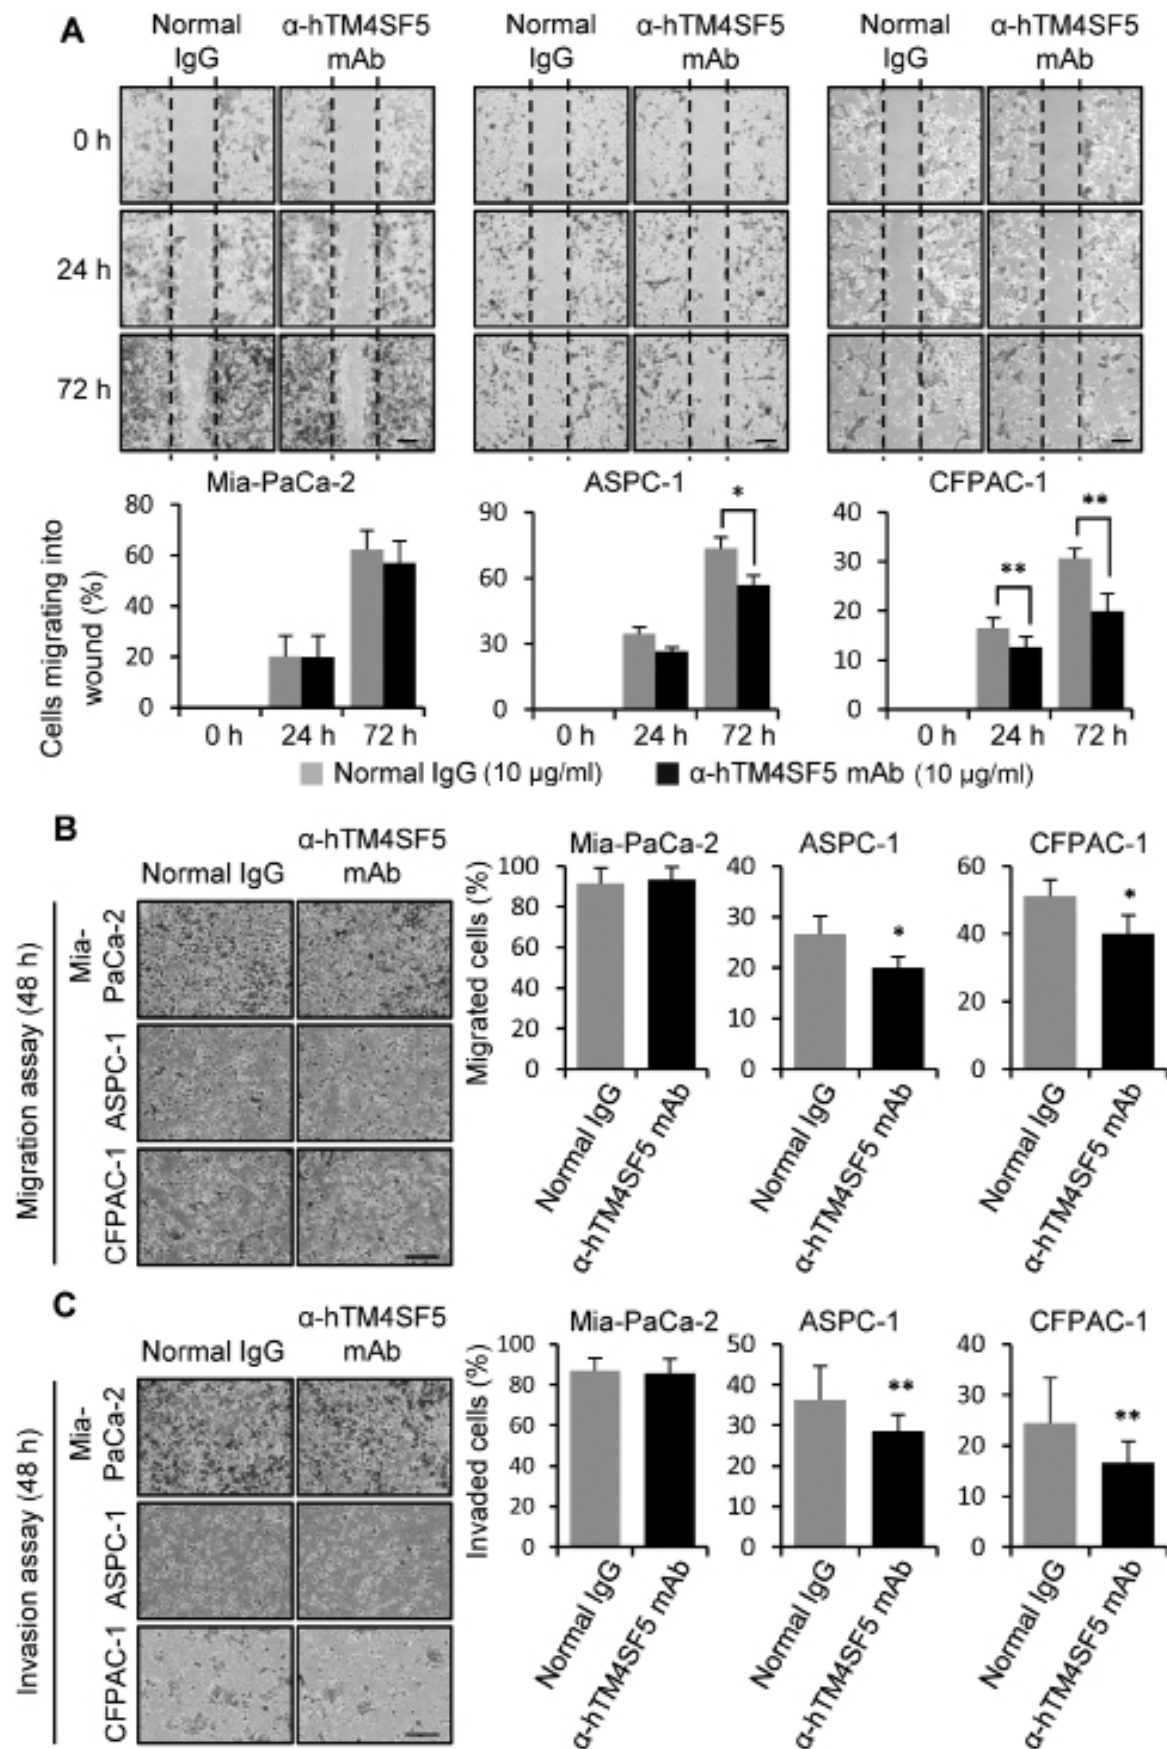

Figure S2. Change of EMT marker expression in human pancreatic cancer cells after the anti-hTM4SF5 mAb treatment. The expression levels of E-cadherin and Vimentin in Mia-PaCa-2 and CFPAC-1 cells were analyzed by western blot analysis at the indicated time points after treatment with normal IgG or the anti-hTM4SF5 mAb. The relative intensities of E-cadherin and Vimentin bands are shown as a graph after normalization with the levels of GAPDH. P values are evaluated using a ratio paired t-test. Values are the means  $\pm$  SEM. \*P<0.05 vs. normal IgG control.

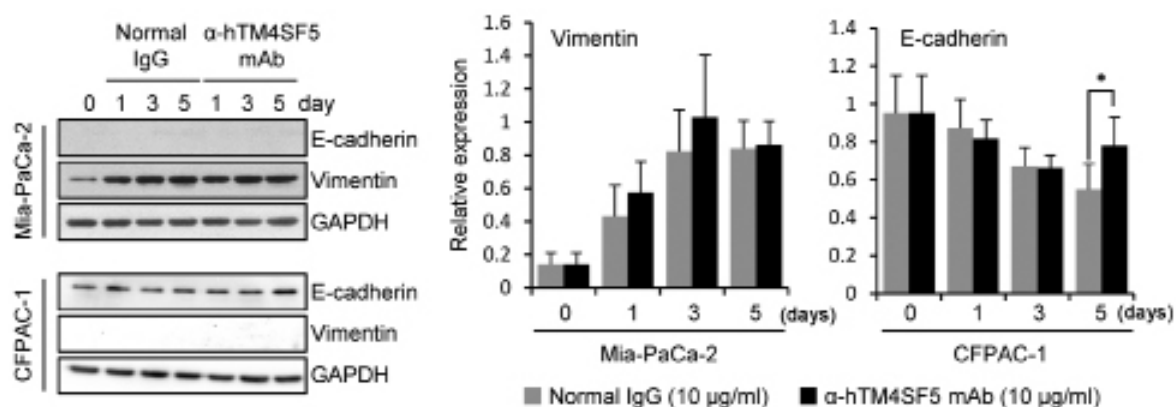

Supplement: Supplementary file 1 [file downloadSupplementary]
